# Supplementary material for: Nuclear Argonaute protein NRDE-3 switches small RNA partners during embryogenesis to mediate temporal-specific gene regulatory activity
Source: eLife journal article supplement (doi:10.7554/elife.102226), 2024-10-21
Supplement: fig1-data1 [file elife-102226-fig1-data1-v1.zip]

## Sheet: Figure 1
Figure 1C - SIMR granule number at different stages
SIMR foci_number	stage
0	1_4cell
0	1_4cell
0	1_4cell
0	1_4cell
0	1_4cell
0	1_4cell
0	1_4cell
0	1_4cell
0	1_4cell
0	1_4cell
0	1_4cell
0	1_4cell
0	2_8cell
1	2_8cell
0	2_8cell
0	2_8cell
1	2_8cell
1	2_8cell
0	2_8cell
0	2_8cell
1	2_8cell
0	2_8cell
0	2_8cell
0	2_8cell
11	3_28cell
5	3_28cell
1	3_28cell
28	3_28cell
18	3_28cell
9	3_28cell
18	3_28cell
24	3_28cell
10	3_28cell
8	3_28cell
225	4_100cell
73	4_100cell
179	4_100cell
141	4_100cell
60	4_100cell
136	4_100cell
77	4_100cell
114	4_100cell
212	4_100cell
196	4_100cell
172	4_100cell
125	4_100cell
196	4_100cell
169	4_100cell
57	4_100cell
195	4_100cell
69	4_100cell
83	4_100cell
95	4_100cell
94	4_100cell
119	4_100cell
65	4_100cell
103	4_100cell
57	5_200cell
26	5_200cell
40	5_200cell
40	5_200cell
49	5_200cell
6	5_200cell
25	5_200cell
20	5_200cell
16	5_200cell
15	5_200cell
20	5_200cell
14	5_200cell
12	5_200cell
