# Supplementary material for: Nuclear Argonaute protein NRDE-3 switches small RNA partners during embryogenesis to mediate temporal-specific gene regulatory activity
Source: eLife journal article supplement (doi:10.7554/elife.102226), 2024-10-21
Supplement: fig1-figsupp2-data1 [file elife-102226-fig1-figsupp2-data1-v1.zip]

Figure 1—figure supplement 2D

Gel1-exposure 25.5s

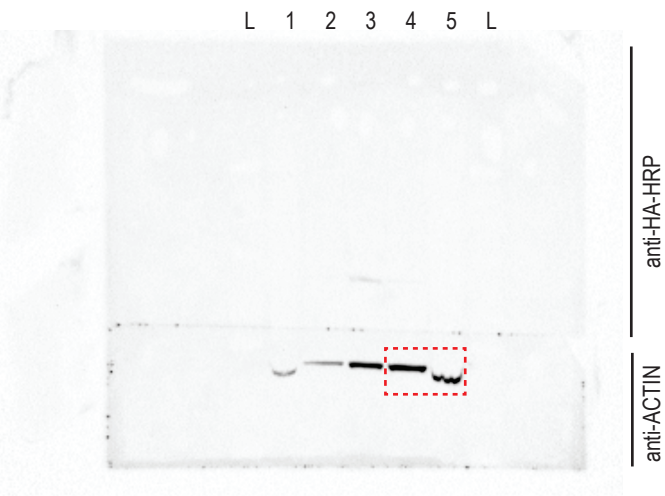

Gel2- exposure 517.9s

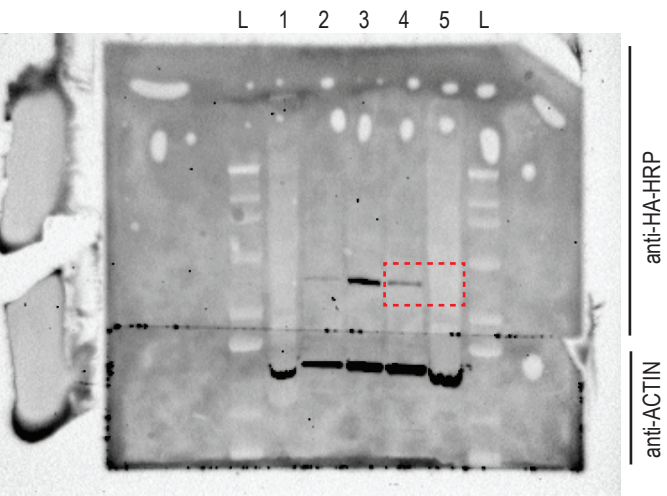

- L: ladder  
lane1: wild-type N2 (young adult-200 worms)  
lane2: ENRI-1::mCherry::2xHA (mixed stage)  
lane3: ENRI-1::mCherry::2xHA (mixed stage)  
lane4: ENRI-1::mCherry::2xHA (young adult-200 worms)  
lane5: wild-type N2 (young adult-200 worms)
