# Supplementary material for: Nuclear Argonaute protein NRDE-3 switches small RNA partners during embryogenesis to mediate temporal-specific gene regulatory activity
Source: eLife journal article supplement (doi:10.7554/elife.102226), 2024-10-21
Supplement: fig2-data1 [file elife-102226-fig2-data1-v1.zip]

## Sheet: Figure 2
Figure 2B - NRDE-3 foci number in different mutants at 100-cell stage					Figure 2C - NRDE-3(HK-AA) foci number at different stages
NRDE-3 foci_number	mutants				NRDE-3 foci_number	stages
0	1_WT				0	1_4cell_HKAA
0	1_WT				0	1_4cell_HKAA
0	1_WT				0	1_4cell_HKAA
0	1_WT				3	1_4cell_HKAA
0	1_WT				0	1_4cell_HKAA
0	1_WT				0	1_4cell_HKAA
0	1_WT				0	1_4cell_HKAA
0	1_WT				4	1_4cell_HKAA
0	1_WT				0	1_4cell_HKAA
0	1_WT				0	1_4cell_HKAA
0	1_WT				0	1_4cell_HKAA
0	1_WT				1	1_4cell_HKAA
0	1_WT				0	1_4cell_HKAA
0	1_WT				0	1_4cell_HKAA
34	2_eri1				0	1_4cell_HKAA
62	2_eri1				0	1_4cell_HKAA
90	2_eri1				0	1_4cell_HKAA
30	2_eri1				5	2_8cell_HKAA
27	2_eri1				2	2_8cell_HKAA
18	2_eri1				2	2_8cell_HKAA
58	2_eri1				0	2_8cell_HKAA
26	2_eri1				0	2_8cell_HKAA
12	2_eri1				0	2_8cell_HKAA
32	2_eri1				1	2_8cell_HKAA
42	2_eri1				4	2_8cell_HKAA
29	2_eri1				0	2_8cell_HKAA
102	3_rde3				0	2_8cell_HKAA
39	3_rde3				1	2_8cell_HKAA
38	3_rde3				0	2_8cell_HKAA
56	3_rde3				44	3_28cell_HKAA
32	3_rde3				39	3_28cell_HKAA
80	3_rde3				9	3_28cell_HKAA
52	3_rde3				17	3_28cell_HKAA
29	3_rde3				7	3_28cell_HKAA
50	3_rde3				4	3_28cell_HKAA
48	3_rde3				11	3_28cell_HKAA
36	3_rde3				19	3_28cell_HKAA
3	3_rde3				2	3_28cell_HKAA
62	3_rde3				29	3_28cell_HKAA
46	3_rde3				14	3_28cell_HKAA
60	3_rde3				10	3_28cell_HKAA
24	3_rde3				131	4_100cell_HKAA
57	3_rde3				181	4_100cell_HKAA
154	4_HKAA				119	4_100cell_HKAA
295	4_HKAA				154	4_100cell_HKAA
113	4_HKAA				100	4_100cell_HKAA
197	4_HKAA				48	4_100cell_HKAA
189	4_HKAA				39	4_100cell_HKAA
48	4_HKAA				72	4_100cell_HKAA
156	4_HKAA				107	4_100cell_HKAA
143	4_HKAA				73	4_100cell_HKAA
175	4_HKAA				63	4_100cell_HKAA
97	4_HKAA				102	4_100cell_HKAA
108	4_HKAA				68	4_100cell_HKAA
192	4_HKAA				20	5_200cell_HKAA
83	4_HKAA				7	5_200cell_HKAA
0	5_HKAA_simr1				32	5_200cell_HKAA
0	5_HKAA_simr1				27	5_200cell_HKAA
0	5_HKAA_simr1				22	5_200cell_HKAA
0	5_HKAA_simr1				31	5_200cell_HKAA
0	5_HKAA_simr1				11	5_200cell_HKAA
0	5_HKAA_simr1				31	5_200cell_HKAA
0	5_HKAA_simr1				40	5_200cell_HKAA
0	5_HKAA_simr1				24	5_200cell_HKAA
0	5_HKAA_simr1				11	5_200cell_HKAA
0	5_HKAA_simr1				18	5_200cell_HKAA
0	5_HKAA_simr1				36	5_200cell_HKAA
0	5_HKAA_simr1				38	5_200cell_HKAA
0	5_HKAA_simr1
0	6_HKAA_enri2
0	6_HKAA_enri2
0	6_HKAA_enri2
0	6_HKAA_enri2
0	6_HKAA_enri2
0	6_HKAA_enri2
0	6_HKAA_enri2
0	6_HKAA_enri2
0	6_HKAA_enri2
0	6_HKAA_enri2
0	6_HKAA_enri2
0	6_HKAA_enri2
