# Supplementary material for: Nuclear Argonaute protein NRDE-3 switches small RNA partners during embryogenesis to mediate temporal-specific gene regulatory activity
Source: eLife journal article supplement (doi:10.7554/elife.102226), 2024-10-21
Supplement: fig2-figsupp1-data3 [file elife-102226-fig2-figsupp1-data3-v1.zip]

## Sheet: SuppFigure 2
Figure 2—figure supplement 1D SIMR foci number in nrde-3(HK-AA) mutant at different stages
SIMR foci_number	stage
0	1_4cell_HKAA
0	1_4cell_HKAA
0	1_4cell_HKAA
3	1_4cell_HKAA
0	1_4cell_HKAA
0	1_4cell_HKAA
0	1_4cell_HKAA
4	1_4cell_HKAA
0	1_4cell_HKAA
0	1_4cell_HKAA
0	1_4cell_HKAA
1	1_4cell_HKAA
0	1_4cell_HKAA
0	1_4cell_HKAA
0	1_4cell_HKAA
0	1_4cell_HKAA
0	1_4cell_HKAA
5	2_8cell_HKAA
2	2_8cell_HKAA
2	2_8cell_HKAA
0	2_8cell_HKAA
0	2_8cell_HKAA
0	2_8cell_HKAA
1	2_8cell_HKAA
4	2_8cell_HKAA
0	2_8cell_HKAA
0	2_8cell_HKAA
1	2_8cell_HKAA
0	2_8cell_HKAA
44	3_28cell_HKAA
39	3_28cell_HKAA
9	3_28cell_HKAA
17	3_28cell_HKAA
7	3_28cell_HKAA
4	3_28cell_HKAA
11	3_28cell_HKAA
19	3_28cell_HKAA
2	3_28cell_HKAA
29	3_28cell_HKAA
14	3_28cell_HKAA
10	3_28cell_HKAA
131	4_100cell_HKAA
181	4_100cell_HKAA
119	4_100cell_HKAA
154	4_100cell_HKAA
100	4_100cell_HKAA
48	4_100cell_HKAA
39	4_100cell_HKAA
72	4_100cell_HKAA
107	4_100cell_HKAA
73	4_100cell_HKAA
63	4_100cell_HKAA
102	4_100cell_HKAA
68	4_100cell_HKAA
20	5_200cell_HKAA
7	5_200cell_HKAA
32	5_200cell_HKAA
27	5_200cell_HKAA
22	5_200cell_HKAA
31	5_200cell_HKAA
11	5_200cell_HKAA
31	5_200cell_HKAA
40	5_200cell_HKAA
24	5_200cell_HKAA
11	5_200cell_HKAA
18	5_200cell_HKAA
36	5_200cell_HKAA
38	5_200cell_HKAA
