# Supplementary material for: Nuclear Argonaute protein NRDE-3 switches small RNA partners during embryogenesis to mediate temporal-specific gene regulatory activity
Source: eLife journal article supplement (doi:10.7554/elife.102226), 2024-10-21
Supplement: fig4-data1 [file elife-102226-fig4-data1-v1.zip]

## Sheet: Figure 4
Figure 4B - Pearson's R value quantification			Figure 4G - CSR foci number at different stages
Pearson_value	strain		CSR-1 foci_number	stages
0.95	a_ENRI-2		115	a_4cell
0.89	a_ENRI-2		134	a_4cell
0.92	a_ENRI-2		114	a_4cell
0.88	a_ENRI-2		129	a_4cell
0.92	a_ENRI-2		164	a_4cell
0.91	a_ENRI-2		139	a_4cell
0.75	a_ENRI-2		133	a_4cell
0.92	a_ENRI-2		88	a_4cell
0.91	a_ENRI-2		116	a_4cell
0.85	a_ENRI-2		78	a_4cell
0.91	a_ENRI-2		99	a_4cell
0.87	a_ENRI-2		125	b_8cell
0.92	a_ENRI-2		189	b_8cell
0.87	a_ENRI-2		155	b_8cell
0.88	a_ENRI-2		120	b_8cell
0.9	a_ENRI-2		188	b_8cell
0.9	a_ENRI-2		191	b_8cell
0.92	a_ENRI-2		195	b_8cell
0.89	a_ENRI-2		140	b_8cell
0.9	a_ENRI-2		179	b_8cell
0.88	a_ENRI-2		155	b_8cell
0.75	b_NRDE-3(HKAA)		155	b_8cell
0.84	b_NRDE-3(HKAA)		417	c_28cell
0.8	b_NRDE-3(HKAA)		362	c_28cell
0.86	b_NRDE-3(HKAA)		323	c_28cell
0.89	b_NRDE-3(HKAA)		374	c_28cell
0.74	b_NRDE-3(HKAA)		389	c_28cell
0.83	b_NRDE-3(HKAA)		262	c_28cell
0.81	b_NRDE-3(HKAA)		404	c_28cell
0.84	b_NRDE-3(HKAA)		333	c_28cell
0.79	b_NRDE-3(HKAA)		244	c_28cell
0.81	b_NRDE-3(HKAA)		377	c_28cell
0.92	b_NRDE-3(HKAA)		169	d_100cell
0.87	b_NRDE-3(HKAA)		154	d_100cell
0.82	b_NRDE-3(HKAA)		228	d_100cell
0.86	b_NRDE-3(HKAA)		307	d_100cell
0.88	b_NRDE-3(HKAA)		193	d_100cell
0.87	b_NRDE-3(HKAA)		321	d_100cell
0.9	b_NRDE-3(HKAA)		221	d_100cell
0.76	b_NRDE-3(HKAA)		142	d_100cell
0.87	b_NRDE-3(HKAA)		299	d_100cell
0.92	c_MUT-2		201	d_100cell
0.87	c_MUT-2		245	d_100cell
0.61	c_MUT-2		192	d_100cell
0.66	c_MUT-2		121	d_100cell
0.92	c_MUT-2		380	d_100cell
0.82	c_MUT-2		242	d_100cell
0.87	c_MUT-2		328	d_100cell
0.92	c_MUT-2		244	d_100cell
0.82	c_MUT-2		248	d_100cell
0.8	c_MUT-2		1	e_200cell
0.81	c_MUT-2		6	e_200cell
0.84	c_MUT-2		7	e_200cell
0.89	c_MUT-2		12	e_200cell
0.68	c_MUT-2		1	e_200cell
0.75	c_MUT-2		0	e_200cell
0.84	c_MUT-2		0	e_200cell
0.66	c_MUT-2		1	e_200cell
0.91	c_MUT-2		1	e_200cell
0.7	c_MUT-2		7	e_200cell
0.83	c_MUT-2		0	e_200cell
0.7	c_MUT-2		0	e_200cell
0.64	c_MUT-2		0	e_200cell
0.8	c_MUT-2		1	e_200cell
0.64	d_RRF-1		3	e_200cell
0.81	d_RRF-1		6	e_200cell
0.63	d_RRF-1		1	e_200cell
0.87	d_RRF-1		1	e_200cell
0.87	d_RRF-1		8	e_200cell
0.83	d_RRF-1
0.89	d_RRF-1
0.85	d_RRF-1
0.79	d_RRF-1
0.83	d_RRF-1
0.72	d_RRF-1
0.76	d_RRF-1
0.65	d_RRF-1
0.69	d_RRF-1
0.82	d_RRF-1
0.64	d_RRF-1
0.74	d_RRF-1
0.92	d_RRF-1
0.87	d_RRF-1
0.83	d_RRF-1
0.77	d_RRF-1
0.79	d_RRF-1
0.84	d_RRF-1
0.33	e_CSR-1
0.62	e_CSR-1
0.22	e_CSR-1
0.31	e_CSR-1
0.2	e_CSR-1
0.51	e_CSR-1
0.66	e_CSR-1
0.21	e_CSR-1
0.32	e_CSR-1
0.43	e_CSR-1
0.45	e_CSR-1
0.45	e_CSR-1
0.52	e_CSR-1
0.39	e_CSR-1
0.34	e_CSR-1
0.39	e_CSR-1
0.09	e_CSR-1
0.5	e_CSR-1
0.23	e_CSR-1
0.76	e_CSR-1
0.89	e_CSR-1
0.17	e_CSR-1
0.81	f_CSR_RRF1
0.75	f_CSR_RRF1
0.67	f_CSR_RRF1
0.79	f_CSR_RRF1
0.87	f_CSR_RRF1
0.76	f_CSR_RRF1
0.87	f_CSR_RRF1
0.83	f_CSR_RRF1
0.77	f_CSR_RRF1
0.74	f_CSR_RRF1
0.76	f_CSR_RRF1
0.82	f_CSR_RRF1
0.79	f_CSR_RRF1
0.7	f_CSR_RRF1
0.67	f_CSR_RRF1
0.69	f_CSR_RRF1
0.77	f_CSR_RRF1
0.84	f_CSR_RRF1
0.85	f_CSR_RRF1
0.7	f_CSR_RRF1
0.76	f_CSR_RRF1
0.68	f_CSR_RRF1
