# Supplementary material for: Nuclear Argonaute protein NRDE-3 switches small RNA partners during embryogenesis to mediate temporal-specific gene regulatory activity
Source: eLife journal article supplement (doi:10.7554/elife.102226), 2024-10-21
Supplement: fig5-data1 [file elife-102226-fig5-data1-v1.zip]

## Sheet: Figure 5
Figure 5B - SIMR granule number at 100-cell stage
foci_number	condition
67	a_L4440
123	a_L4440
94	a_L4440
47	a_L4440
27	a_L4440
56	a_L4440
139	a_L4440
44	a_L4440
86	a_L4440
87	a_L4440
150	a_L4440
59	a_L4440
116	a_L4440
64	a_L4440
234	b_lgg1_RNAi
187	b_lgg1_RNAi
155	b_lgg1_RNAi
146	b_lgg1_RNAi
154	b_lgg1_RNAi
147	b_lgg1_RNAi
212	b_lgg1_RNAi
275	b_lgg1_RNAi
171	b_lgg1_RNAi
211	b_lgg1_RNAi
174	b_lgg1_RNAi
181	b_lgg1_RNAi
121	b_lgg1_RNAi
132	b_lgg1_RNAi
