# Supplementary material for: Nuclear Argonaute protein NRDE-3 switches small RNA partners during embryogenesis to mediate temporal-specific gene regulatory activity
Source: eLife journal article supplement (doi:10.7554/elife.102226), 2024-10-21
Supplement: fig5-figsupp1-data1 [file elife-102226-fig5-figsupp1-data1-v1.zip]

## Sheet: SuppFigure 5
Figure 5—figure supplement 1—source data 1B. Pearson's R value quantification at comma stage
Pearson value	strain
0.88	a_ENRI2
0.82	a_ENRI2
0.92	a_ENRI2
0.87	a_ENRI2
0.87	a_ENRI2
0.75	a_ENRI2
0.82	a_ENRI2
0.89	a_ENRI2
0.86	a_ENRI2
0.89	a_ENRI2
0.87	a_ENRI2
0.88	a_ENRI2
0.9	a_ENRI2
0.89	a_ENRI2
0.91	a_ENRI2
0.9	a_ENRI2
0.9	a_ENRI2
0.85	a_ENRI2
0.79	a_ENRI2
0.93	a_ENRI2
0.88	a_ENRI2
0.89	a_ENRI2
0.8	a_ENRI2
0.9	b_MUT2
0.86	b_MUT2
0.92	b_MUT2
0.94	b_MUT2
0.8	b_MUT2
0.83	b_MUT2
0.93	b_MUT2
0.84	b_MUT2
0.92	b_MUT2
0.95	b_MUT2
0.89	b_MUT2
0.85	b_MUT2
0.9	b_MUT2
0.93	b_MUT2
0.83	b_MUT2
0.9	b_MUT2
0.92	b_MUT2
0.9	b_MUT2
0.9	b_MUT2
0.82	b_MUT2
0.87	b_MUT2
0.9	b_MUT2
0.89	b_MUT2
0.9	c_RRF1
0.9	c_RRF1
0.88	c_RRF1
0.78	c_RRF1
0.87	c_RRF1
0.88	c_RRF1
0.87	c_RRF1
0.83	c_RRF1
0.88	c_RRF1
0.88	c_RRF1
0.87	c_RRF1
0.74	c_RRF1
0.84	c_RRF1
0.8	c_RRF1
0.87	c_RRF1
0.92	c_RRF1
0.82	c_RRF1
0.81	c_RRF1
0.8	c_RRF1
0.76	c_RRF1
0.88	c_RRF1
0.85	c_RRF1
0.87	c_RRF1
0.8	c_RRF1
0.86	d_NRDE3_eri1
0.87	d_NRDE3_eri1
0.86	d_NRDE3_eri1
0.87	d_NRDE3_eri1
0.82	d_NRDE3_eri1
0.86	d_NRDE3_eri1
0.8	d_NRDE3_eri1
0.78	d_NRDE3_eri1
0.86	d_NRDE3_eri1
0.82	d_NRDE3_eri1
0.76	d_NRDE3_eri1
0.83	d_NRDE3_eri1
0.79	d_NRDE3_eri1
0.74	d_NRDE3_eri1
0.73	d_NRDE3_eri1
0.71	d_NRDE3_eri1
0.91	d_NRDE3_eri1
0.85	d_NRDE3_eri1
0.88	d_NRDE3_eri1
0.91	d_NRDE3_eri1
0.78	d_NRDE3_eri1
0.76	d_NRDE3_eri1
0.69	d_NRDE3_eri1
