# Supplementary material for: Nuclear Argonaute protein NRDE-3 switches small RNA partners during embryogenesis to mediate temporal-specific gene regulatory activity
Source: eLife journal article supplement (doi:10.7554/elife.102226), 2024-10-21
Supplement: fig7-data1 [file elife-102226-fig7-data1-v1.zip]

## Sheet: Figure 7
Figure 7D - Number of embryos laid per adult in different strains
Number of embryos	strain
86	Auxin_1236		Auxin_1236: csr-1::degron (4mM auxin)
62	Auxin_1236		Auxin_1660: csr-1::degron; gfp::nrde-3(HK-AA) (4mM auxin)
110	Auxin_1236
0	Auxin_1236
57	Auxin_1236
25	Auxin_1236
0	Auxin_1236
158	Auxin_1236
61	Auxin_1236
0	Auxin_1236
66	Auxin_1236
66	Auxin_1236
53	Auxin_1236
38	Auxin_1236
68	Auxin_1236
50	Auxin_1236
38	Auxin_1236
13	Auxin_1236
33	Auxin_1236
54	Auxin_1236
24	Auxin_1236
149	Auxin_1236
20	Auxin_1236
41	Auxin_1236
36	Auxin_1236
54	Auxin_1236
95	Auxin_1236
34	Auxin_1236
93	Auxin_1236
18	Auxin_1236
78	Auxin_1236
75	Auxin_1236
42	Auxin_1236
47	Auxin_1236
28	Auxin_1236
73	Auxin_1236
45	Auxin_1236
47	Auxin_1236
67	Auxin_1236
17	Auxin_1236
62	Auxin_1236
65	Auxin_1236
85	Auxin_1236
63	Auxin_1236
18	Auxin_1236
45	Auxin_1236
59	Auxin_1236
85	Auxin_1236
55	Auxin_1236
116	Auxin_1236
30	Auxin_1236
60	Auxin_1236
67	Auxin_1236
47	Auxin_1236
133	Auxin_1236
69	Auxin_1236
86	Auxin_1236
30	Auxin_1236
125	Auxin_1236
3	Auxin_1236
83	Auxin_1236
123	Auxin_1236
39	Auxin_1236
54	Auxin_1236
0	Auxin_1236
0	Auxin_1236
71	Auxin_1236
42	Auxin_1236
11	Auxin_1660
0	Auxin_1660
66	Auxin_1660
20	Auxin_1660
16	Auxin_1660
8	Auxin_1660
0	Auxin_1660
59	Auxin_1660
48	Auxin_1660
55	Auxin_1660
25	Auxin_1660
12	Auxin_1660
7	Auxin_1660
20	Auxin_1660
53	Auxin_1660
39	Auxin_1660
15	Auxin_1660
53	Auxin_1660
22	Auxin_1660
56	Auxin_1660
59	Auxin_1660
16	Auxin_1660
0	Auxin_1660
30	Auxin_1660
0	Auxin_1660
21	Auxin_1660
27	Auxin_1660
28	Auxin_1660
7	Auxin_1660
31	Auxin_1660
12	Auxin_1660
25	Auxin_1660
6	Auxin_1660
6	Auxin_1660
15	Auxin_1660
10	Auxin_1660
51	Auxin_1660
0	Auxin_1660
33	Auxin_1660
7	Auxin_1660
48	Auxin_1660
48	Auxin_1660
36	Auxin_1660
41	Auxin_1660
30	Auxin_1660
9	Auxin_1660
37	Auxin_1660
5	Auxin_1660
19	Auxin_1660
8	Auxin_1660
0	Auxin_1660
0	Auxin_1660
8	Auxin_1660
23	Auxin_1660
7	Auxin_1660
0	Auxin_1660
27	Auxin_1660
27	Auxin_1660
3	Auxin_1660
52	Auxin_1660
44	Auxin_1660
8	Auxin_1660
27	Auxin_1660
17	Auxin_1660
14	Auxin_1660
20	Auxin_1660
18	Auxin_1660
