# Supplementary material for: Nuclear Argonaute protein NRDE-3 switches small RNA partners during embryogenesis to mediate temporal-specific gene regulatory activity
Source: eLife journal article supplement (doi:10.7554/elife.102226), 2024-10-21
Supplement: fig8-data1 [file elife-102226-fig8-data1-v1.zip]

## Sheet: Figure 8
Figure 8C - PSer2 signal intensity in oocytes					Figure 8D - PSer2 signal pattern in oocytes
					1425: GFP::NRDE-3
Intensity	Strain	Oocyte			1563: GFP::NRDE-3(HK-AA)
22520.8	a_wt	Oocyte_1				1425	1563		1425	1563		1425	1563		1425	1563		1425	1563		1425	1563		1425	1563
20628.9	a_wt	Oocyte_1				-1	-1		-2	-2		-3	-3		-4	-4		-5	-5		-6	-6		-7	-7
20964.2	a_wt	Oocyte_1			Excluded from DNA	1	1		0.944444	0.833333		0.666667	0.222222		0.0666667	0		0	0		0	0		0	0
20371.8	a_wt	Oocyte_1			Diffuse	0	0		0.0555556	0.166667		0.166667	0.166667		0.266667	0		0.153846	0		0.0909091	0		0	0
14332.1	a_wt	Oocyte_1			On DNA	0	0		0	0		0.166667	0.611111		0.666667	1		0.846154	1		0.909091	1		1	1
19138.5	a_wt	Oocyte_1
15873.6	a_wt	Oocyte_1
25999.8	a_wt	Oocyte_1
27234.4	a_wt	Oocyte_1
40180.3	a_wt	Oocyte_1
23168.1	a_wt	Oocyte_1
33603.2	a_wt	Oocyte_1
12102.1	a_wt	Oocyte_1
22181.1	a_wt	Oocyte_1
17340.8	a_wt	Oocyte_1
31849.6	a_wt	Oocyte_1
20627.7	a_wt	Oocyte_1
49988.9	b_HKAA	Oocyte_1
27571.8	b_HKAA	Oocyte_1
30490.5	b_HKAA	Oocyte_1
33291.3	b_HKAA	Oocyte_1
37347.5	b_HKAA	Oocyte_1
32025.5	b_HKAA	Oocyte_1
27598	b_HKAA	Oocyte_1
29757.7	b_HKAA	Oocyte_1
28187.6	b_HKAA	Oocyte_1
22400.6	b_HKAA	Oocyte_1
23875.9	b_HKAA	Oocyte_1
23514.9	b_HKAA	Oocyte_1
26831.6	b_HKAA	Oocyte_1
27977.3	b_HKAA	Oocyte_1
40697.4	b_HKAA	Oocyte_1
21327.4	b_HKAA	Oocyte_1
23119.9	b_HKAA	Oocyte_1
24281.2	a_wt	Oocyte_2
22310.1	a_wt	Oocyte_2
22282.8	a_wt	Oocyte_2
22803.2	a_wt	Oocyte_2
16805.5	a_wt	Oocyte_2
19860.5	a_wt	Oocyte_2
9944.85	a_wt	Oocyte_2
28793.7	a_wt	Oocyte_2
33629.9	a_wt	Oocyte_2
32532.5	a_wt	Oocyte_2
27317.2	a_wt	Oocyte_2
26516.3	a_wt	Oocyte_2
17131.7	a_wt	Oocyte_2
26031.3	a_wt	Oocyte_2
20123.7	a_wt	Oocyte_2
28092.6	a_wt	Oocyte_2
22370.6	a_wt	Oocyte_2
41660.5	b_HKAA	Oocyte_2
26253.2	b_HKAA	Oocyte_2
31465.8	b_HKAA	Oocyte_2
29561.3	b_HKAA	Oocyte_2
36334.2	b_HKAA	Oocyte_2
27501.6	b_HKAA	Oocyte_2
34851.7	b_HKAA	Oocyte_2
26809.2	b_HKAA	Oocyte_2
25889.4	b_HKAA	Oocyte_2
27759.8	b_HKAA	Oocyte_2
28374	b_HKAA	Oocyte_2
32485.2	b_HKAA	Oocyte_2
29263.3	b_HKAA	Oocyte_2
31451.4	b_HKAA	Oocyte_2
33939.5	b_HKAA	Oocyte_2
19833.5	b_HKAA	Oocyte_2
32477.4	b_HKAA	Oocyte_2
26870.9	a_wt	Oocyte_3
21152	a_wt	Oocyte_3
20473.1	a_wt	Oocyte_3
24712.9	a_wt	Oocyte_3
18279.5	a_wt	Oocyte_3
20722.9	a_wt	Oocyte_3
12510.7	a_wt	Oocyte_3
29395.2	a_wt	Oocyte_3
34365.7	a_wt	Oocyte_3
29523.2	a_wt	Oocyte_3
26550.4	a_wt	Oocyte_3
28961.4	a_wt	Oocyte_3
18881.8	a_wt	Oocyte_3
23442.4	a_wt	Oocyte_3
20121.6	a_wt	Oocyte_3
26282.9	a_wt	Oocyte_3
22407.2	a_wt	Oocyte_3
35835.5	b_HKAA	Oocyte_3
28086.8	b_HKAA	Oocyte_3
28699.4	b_HKAA	Oocyte_3
30156.3	b_HKAA	Oocyte_3
35079.8	b_HKAA	Oocyte_3
26434.7	b_HKAA	Oocyte_3
31738.7	b_HKAA	Oocyte_3
27494.2	b_HKAA	Oocyte_3
25006.1	b_HKAA	Oocyte_3
26127	b_HKAA	Oocyte_3
28306.3	b_HKAA	Oocyte_3
33138.5	b_HKAA	Oocyte_3
27941.7	b_HKAA	Oocyte_3
35668	b_HKAA	Oocyte_3
31070.8	b_HKAA	Oocyte_3
22623.2	b_HKAA	Oocyte_3
28085.5	b_HKAA	Oocyte_3
25921.9	a_wt	Oocyte_4
24586.2	a_wt	Oocyte_4
23620.4	a_wt	Oocyte_4
18139.7	a_wt	Oocyte_4
14245.3	a_wt	Oocyte_4
29800.1	a_wt	Oocyte_4
32172	a_wt	Oocyte_4
31890.5	a_wt	Oocyte_4
28775.6	a_wt	Oocyte_4
16193.8	a_wt	Oocyte_4
25471.6	a_wt	Oocyte_4
21096.1	a_wt	Oocyte_4
24259.4	a_wt	Oocyte_4
24921.3	a_wt	Oocyte_4
39400.1	b_HKAA	Oocyte_4
29239.9	b_HKAA	Oocyte_4
26040.4	b_HKAA	Oocyte_4
29660.2	b_HKAA	Oocyte_4
33085.3	b_HKAA	Oocyte_4
30293	b_HKAA	Oocyte_4
29455.4	b_HKAA	Oocyte_4
20679.5	b_HKAA	Oocyte_4
22862.6	b_HKAA	Oocyte_4
34693.2	b_HKAA	Oocyte_4
27051.6	b_HKAA	Oocyte_4
28052.9	b_HKAA	Oocyte_4
38662.2	b_HKAA	Oocyte_4
32171.2	b_HKAA	Oocyte_4
23097.3	b_HKAA	Oocyte_4
27218.2	b_HKAA	Oocyte_4
23084.3	a_wt	Oocyte_5
24553.1	a_wt	Oocyte_5
29525.1	a_wt	Oocyte_5
28360	a_wt	Oocyte_5
32779.5	a_wt	Oocyte_5
26214.7	a_wt	Oocyte_5
17216.2	a_wt	Oocyte_5
25441.5	a_wt	Oocyte_5
21650.6	a_wt	Oocyte_5
22134.8	a_wt	Oocyte_5
23640.5	a_wt	Oocyte_5
32490.8	b_HKAA	Oocyte_5
23107.5	b_HKAA	Oocyte_5
30155.2	b_HKAA	Oocyte_5
32313.1	b_HKAA	Oocyte_5
28519.3	b_HKAA	Oocyte_5
31690.6	b_HKAA	Oocyte_5
21226.6	b_HKAA	Oocyte_5
34226.6	b_HKAA	Oocyte_5
28865	b_HKAA	Oocyte_5
27811.3	b_HKAA	Oocyte_5
41632.5	b_HKAA	Oocyte_5
33105.7	b_HKAA	Oocyte_5
22920.1	b_HKAA	Oocyte_5
28286.6	b_HKAA	Oocyte_5
24335.3	a_wt	Oocyte_6
24864.5	a_wt	Oocyte_6
25167.3	a_wt	Oocyte_6
26640.1	a_wt	Oocyte_6
34869.5	a_wt	Oocyte_6
23844.5	a_wt	Oocyte_6
18528.2	a_wt	Oocyte_6
21574.1	a_wt	Oocyte_6
17905.1	a_wt	Oocyte_6
19482.3	a_wt	Oocyte_6
35707.7	b_HKAA	Oocyte_6
22099.9	b_HKAA	Oocyte_6
29205.8	b_HKAA	Oocyte_6
21703.6	b_HKAA	Oocyte_6
26414.2	b_HKAA	Oocyte_6
33428.5	b_HKAA	Oocyte_6
41909.3	b_HKAA	Oocyte_6
30136.4	b_HKAA	Oocyte_6
28139.7	b_HKAA	Oocyte_6
43981.8	b_HKAA	Oocyte_6
35663.1	b_HKAA	Oocyte_6
22992.8	b_HKAA	Oocyte_6
24124.2	b_HKAA	Oocyte_6
32456.5	a_wt	Oocyte_7
26444.3	a_wt	Oocyte_7
24749.2	a_wt	Oocyte_7
19685.2	a_wt	Oocyte_7
24319.2	a_wt	Oocyte_7
19744.3	a_wt	Oocyte_7
18870.5	a_wt	Oocyte_7
34547.1	b_HKAA	Oocyte_7
21539.4	b_HKAA	Oocyte_7
28889.3	b_HKAA	Oocyte_7
24322.9	b_HKAA	Oocyte_7
38229.8	b_HKAA	Oocyte_7
49154.9	b_HKAA	Oocyte_7
30625	b_HKAA	Oocyte_7
29092.2	b_HKAA	Oocyte_7
48405.6	b_HKAA	Oocyte_7
38737.4	b_HKAA	Oocyte_7
26098	b_HKAA	Oocyte_7
26080.9	b_HKAA	Oocyte_7
