# Supplementary figures and images for: Nuclear Argonaute protein NRDE-3 switches small RNA partners during embryogenesis to mediate temporal-specific gene regulatory activity
Source: eLife journal article supplement (doi:10.7554/elife.102226), 2024-10-21

Figure 2 -- figure supplementary 1B

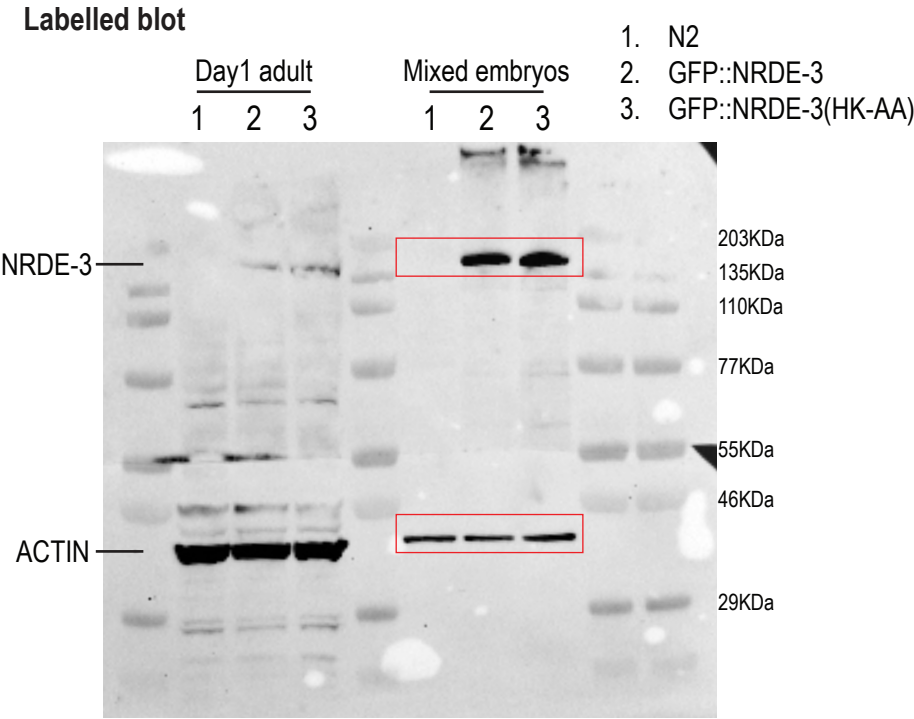

Supplement: fig2-figsupp1-data1 [file elife-102226-fig2-figsupp1-data1-v1.zip]

Figure 3—figure supplement 1A

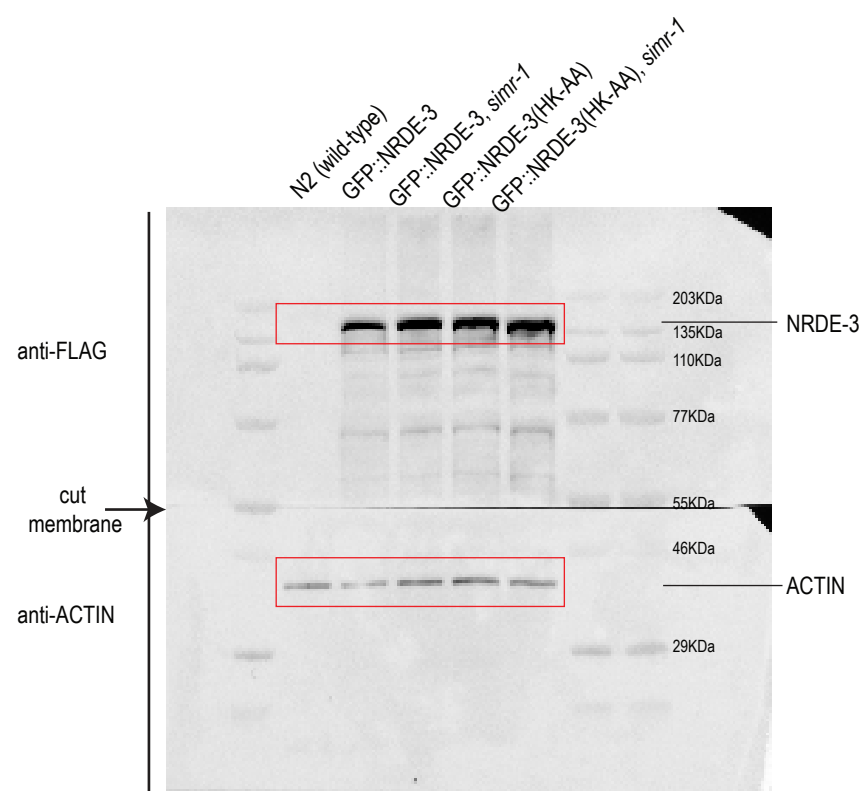

Supplement: fig3-figsupp1-data1 [file elife-102226-fig3-figsupp1-data1-v1.zip]
